# Supplementary material for: Targeting the Notch1 oncogene by miR-139-5p inhibits glioma metastasis and epithelial-mesenchymal transition (EMT)
Source: PubMed Central journal article supplement (PMC6117922; doi:10.1186/s12883-018-1139-8), 2018-08-31
Supplement: 12883_2018_1139_MOESM1_ESM.pdf [file 12883_2018_1139_MOESM1_ESM.pdf]

**Table S1. The Oligonucleotides sequences were as follows:**

miR-139-5p mimics were designed and purchased from GenePharma (Shanghai, China). miR-139-5p mimics: sense 5'-UCUACAGUGCACGUGUCUCCAGU-3'. anti-sense: 5'-UGGAGACACGUGCACUGUAGAUU-3'. Notch1 siRNA were designed and purchased from Invitrogen (by Life Invitrogen, USA). siRNA sequences were as follows:

Notch-1: 5' to 3': r(UGGCGGGAAGUGUGAAGCG)d(TT), r(CGCUUCACACUCCCCGCCA)d(TT). And a scramble siRNA sequence (5' to 3': UUCUCCGAACGUGUCACGUTT, ACGUGACACGUUCGGAGAATT) was used as a control.
