# Supplementary material for: Targeting the Notch1 oncogene by miR-139-5p inhibits glioma metastasis and epithelial-mesenchymal transition (EMT)
Source: PubMed Central journal article supplement (PMC6117922; doi:10.1186/s12883-018-1139-8), 2018-08-31
Supplement: 12883_2018_1139_MOESM2_ESM.pdf [file 12883_2018_1139_MOESM2_ESM.pdf]

**Additional file 2.** Gene-specific primers for qRT-PCR analysis

|                   |                                        |                    |                                           |
|-------------------|----------------------------------------|--------------------|-------------------------------------------|
| <b>Notch1</b>     | <b>F 5'- TGAATGGCGGGAAGTGTGAA -3'</b>  | <b>Fibronectin</b> | <b>F 5'- ATCACCTCACCAACCTCAC -3'</b>      |
|                   | <b>R 5'- ATAGTCTGCCACGCCTCTG -3'</b>   |                    | <b>R 5'- TCCCTCGGAACATCAGAAAC -3'</b>     |
| <b>N-cadherin</b> | <b>F 5'- CTGACAATGACCCACAGC -3'</b>    | <b>Vimentin</b>    | <b>F 5'- GAAGGAGGAAATGGCTCGTC -3'</b>     |
|                   | <b>R 5'- TCCTGCTCACCACCACTACTT -3'</b> |                    | <b>R 5'- CTCAGGTTCAGGGAGGAAAAG -3'</b>    |
| <b>E-cadherin</b> | <b>5'- TGATTCTGCTGCTCTGCTG -3'</b>     | <b>GAPDH</b>       | <b>F 5'- TGGACTCCACGACGTACTCAG -3'</b>    |
|                   | <b>R 5'- CTCTTCTCCGCCTCCTTCTT -3'</b>  |                    | <b>R 5'- CGGGAAGCTTGTTCATCAATGGAA -3'</b> |
