# Supplementary material for: Targeting the Notch1 oncogene by miR-139-5p inhibits glioma metastasis and epithelial-mesenchymal transition (EMT)
Source: PubMed Central journal article supplement (PMC6117922; doi:10.1186/s12883-018-1139-8), 2018-08-31
Supplement: 12883_2018_1139_MOESM3_ESM.pdf [file 12883_2018_1139_MOESM3_ESM.pdf]

**Additional file 3. miR-139-5p expression was quantified by qRT-PCR analysis.**

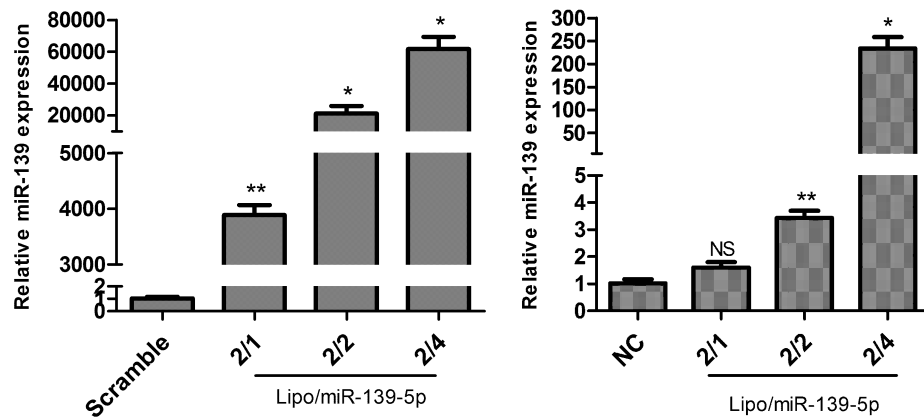

miR-139-5p mimics significantly increased miR-139-5p expression (normalized to U6 RNA) in both LN229 cells (Left) and U87 cells (Right) (\* $P < 0.05$ . \*\* $P < 0.01$ . NS, not significant), relative to the control.
